# Supplementary material for: Methodological Evaluation of High-Density Fractionation Mapping Parameters for Cardioneuroablation: A Pilot Derivation and Validation Study
Source: Research Square preprint supplement (doi:10.21203/rs.3.rs-8467859/v1), 2026-01-12
Supplement: Supplementary file 1 [file 4a8e084d83f0cd73ca6acc35.docx]

Supplementary material to:

Methodological Evaluation of High-Density Fractionation Mapping Parameters for Cardioneuroablation: A Pilot Derivation and Validation Study

**Table 1**: possible combinations for fractionation mapping characteristics

| Width (ms) | 5 | 10 | 15 |
| --- | --- | --- | --- |
| Refractoriness (ms) | 20 | 25 | 30 |
| Amplitude threshold (mV) | 0.05 | 0.1 | 0.15 |

**Table 2:** Sensitivity and specificity obtained in the derivation cohort with different configurations according to the value programmed for each variable on each configuration.

| **SENSITIVITY** | | | | | |
| --- | --- | --- | --- | --- | --- |
| Variable | Value | n* | mean | SD | P (Anova) |
| Width | 5 ms | 8 | 49.5 | 13.69 | 0.09 |
| 10 ms | 9 | 60.12 | 11.47 |
| 15 ms | 8 | 62.49 | 10.91 |
| Refractory | 20 ms | 7 | 65.82 | 6.29 | <0.001 |
| 25 ms | 9 | 62.52 | 10.62 |
| 30 ms | 9 | 45.96 | 10.74 |
| Amplitude threshold | 0.05 mV | 9 | 65.35 | 9.75 | 0.031 |
| 0.1 mV | 8 | 56.61 | 9.22 |
| 0.15 mV | 8 | 49.5 | 14.85 |
| **SPECIFICITY** | | | | | |
| Width | 5 ms | 8 | 71.27 | 11.66 | 0.205 |
| 10 ms | 9 | 63.95 | 10.67 |
| 15 ms | 8 | 61.74 | 10.12 |
| Refractory | 20 ms | 7 | 54.11 | 3.79 | < 0.001 |
| 25 ms | 9 | 64.73 | 7.93 |
| 30 ms | 9 | 75.37 | 8.68 |
| Amplitude threshold | 0.05 mV | 9 | 58.53 | 7.4 | 0.035 |
| 0.1 mV | 8 | 67.24 | 9.74 |
| 0.15 mV | 8 | 71.87 | 12.49 |

Abbreviations: n*: number of configurations tested

**Table 3:** location of positive parasympathetic response sites in derivation cohort

| Vein | Quadrant | Sites with a parasympathetic response | | Sites w/o a parasympathetic response | | Total # sites |
| --- | --- | --- | --- | --- | --- | --- |
| n | % | n | % |
| Right | Inferior - Anterior | 3 | 3.1 | 93 | 96.9 | 96 |
| Inferior - Posterior | 5 | 3.4 | 143 | 96.6 | 148 |
| Superior - Anterior | 14 | 9.4* | 135 | 90.6 | 149 |
| Superior- Posterior | 4 | 4.1 | 93 | 95.9 | 97 |
| Left | Inferior - Anterior | 9 | 11.3* | 71 | 88.8 | 80 |
| Inferior- Posterior | 7 | 5.9 | 112 | 94.1 | 119 |
| Superior - Anterior | 13 | 11.3* | 102 | 88.7 | 115 |
| Superior- Posterior | 6 | 9.1 | 60 | 90.9 | 66 |
| Total | | 61 | 7.01 | 809 | 92.99 | 870 |

*Highest value.

**Table 4:** comparison between approaches

|  | Lellouche 6 | Present study | |
| --- | --- | --- | --- |
| Derivation cohort | Validation cohort |
| Recording system and mapping software | Cardiolab TM platform. (GE Medical Systems TM Waukesha. WI. USA) and Carto TM (Biosense Webster TM. Diamond Bar. CA. USA) | EnSite NavX TM (Cardiac Mapping System. St Jude Medical TM. Abbott TM. Sylmar. CA. USA | |
| Mapping catheter | Not used. | Advisor TM HD Grid Mapping Catheter Sensor Enabled TM Abbott. Minneapolis. MN. USA | |
| Ablation catheter | Navistar TM (Biosense Webster TM. Diamond Bar. CA. USA) | Tacticath TM or TactiFlex TM (St Jude Medical TM. Abbott TM. Sylmar. CA. USA | |
| Patients | 30 | 12 | 14 |
| Type of study | Retrospective | Prospective | Prospective |
| # Ablation sites | 1662 | 870 | 614 |
| # Ablation sites per patient | 59.1 | 72.5 | 43.85 |
| Predictors analyzed | EGM characteristics:   - Duration - Amplitude - # deflections | EGM characteristics   - Width (duration) - Amplitude threshold - Refractoriness. | |
| Definition of parasympathetic response. | - Increase > 20% in HR. or - Increase > 10 ms in AH interval. | - Absolute change > 10% in RR. - Asystole > 3 sec - Transitory AV block | |
| # Ablation sites with parasympathetic response | 184 (11.1%)    Increase AH (71%)  Decrease HR (23%)  Both: 6% | 64 (7.34%)    Absolute change > 10% in RR. 61 (7.01%)  Asystole > 3 seg : 3 (0.33%)  Transitory AV block: 0 | 81 (13.19%)    Absolute change > 10% in RR: 69 (11.23%)  Asystole > 3 s: 6 (0.97%)  Transitory AV block: 14 (2.3%) |
